# Supplementary material for: Characteristics of Salmonella From Chinese Native Chicken Breeds Fed on Conventional or Antibiotic-Free Diets
Source: Front Vet Sci. 2021 Mar 23;8:607491. doi: 10.3389/fvets.2021.607491 (PMC8021795; doi:10.3389/fvets.2021.607491)
Supplement: Supplementary file 1 [file Table_1.XLSX]

## Sheet: Suppl. Table S1
No.	Breeder	Serotype	MLST	Resistance phenotype
L1	Luhua	Salmonella Pullorum	92	STR-ERY-FOX
L2	Luhua	Salmonella Pullorum	92	STR-ERY-FOX
L3	Luhua	Salmonella Enteritidis	11	ERY
L4	Luhua	Salmonella Pullorum	92	STR-ERY
L5	Luhua	Salmonella Enteritidis	11	ERY
L6	Luhua	Salmonella Enteritidis	11	STR-ERY-FOX
L7	Luhua	Salmonella Pullorum	92	STR-ERY-AMP-AMX-SXT
L8	Luhua	Salmonella Pullorum	92	STR-ERY-FOX
L9	Luhua	Salmonella Pullorum	92	ERY
L10	Luhua	Salmonella Pullorum	92	ERY
L11	Luhua	Salmonella Pullorum	92	ERY
L12	Luhua	Salmonella Pullorum	92	ERY
L13	Luhua	Salmonella Pullorum	92	ERY
L14	Luhua	Salmonella Pullorum	92	ERY
L15	Luhua	Salmonella Enteritidis	11	STR-ERY-CAZ
L16	Luhua	Salmonella Pullorum	92	ERY
L17	Luhua	Salmonella Pullorum	92	STR-ERY
L18	Luhua	Salmonella Pullorum	92	None
L19	Luhua	Salmonella Pullorum	92	STR-ERY-CAZ
L20	Luhua	Salmonella Pullorum	92	STR-ERY
L21	Luhua	Salmonella Pullorum	92	STR-ERY-AMP-AMX-SXT
L22	Luhua	Salmonella Pullorum	92	STR-TCY-ERY
L23	Luhua	Salmonella Pullorum	92	AMP-AMX
L24	Luhua	Salmonella Pullorum	92	ERY
L25	Luhua	Salmonella Pullorum	92	STR-ERY
L26	Luhua	Salmonella Enteritidis	11	ERY
L27	Luhua	Salmonella Pullorum	92	ERY
L28	Luhua	Salmonella Pullorum	92	ERY
L29	Luhua	Salmonella Pullorum	92	ERY
L30	Luhua	Salmonella Pullorum	92	ERY
L31	Luhua	Salmonella Pullorum	92	ERY
L32	Luhua	Salmonella Pullorum	92	ERY
L33	Luhua	Salmonella Pullorum	92	ERY
L34	Luhua	Salmonella Pullorum	92	ERY
L35	Luhua	Salmonella Pullorum	92	ERY
L36	Luhua	Salmonella Pullorum	92	ERY-CAZ
L37	Luhua	Salmonella Enteritidis	92	ERY
L38	Luhua	Salmonella Pullorum	92	ERY
L39	Luhua	Salmonella Pullorum	92	STR-ERY
L40	Luhua	Salmonella Pullorum	92	ERY
L41	Luhua	Salmonella Pullorum	92	STR-ERY
L42	Luhua	Salmonella Pullorum	92	ERY
L43	Luhua	Salmonella Pullorum	92	ERY
L44	Luhua	Salmonella Pullorum	92	ERY
L45	Luhua	Salmonella Pullorum	92	ERY-AMP-AMX
L46	Luhua	Salmonella Pullorum	92	ERY
L47	Luhua	Salmonella Enteritidis	11	ERY-CAZ
L48	Luhua	Salmonella Pullorum	92	STR-ERY
L49	Luhua	Salmonella Pullorum	92	ERY
L50	Luhua	Salmonella Pullorum	92	ERY
L51	Luhua	Salmonella Pullorum	92	ERY
L52	Luhua	Salmonella Pullorum	92	ERY
L53	Luhua	Salmonella Pullorum	92	ERY
L54	Luhua	Salmonella Pullorum	92	ERY
L55	Luhua	Salmonella Pullorum	92	ERY
L56	Luhua	Salmonella Pullorum	92	STR-ERY
L57	Luhua	Salmonella Pullorum	92	ERY-CAZ
L58	Luhua	Salmonella Pullorum	92	ERY
L59	Luhua	Salmonella Pullorum	92	ERY
L60	Luhua	Salmonella Pullorum	92	ERY
L61	Luhua	Salmonella Pullorum	92	ERY
L62	Luhua	Salmonella Pullorum	92	ERY
L63	Luhua	Salmonella Pullorum	92	STR-ERY-AMP-CAZ-FOX
L64	Luhua	Salmonella Pullorum	92	STR-ERY-AMP
L65	Luhua	Salmonella Pullorum	92	ERY
L66	Luhua	Salmonella Pullorum	92	ERY
L67	Luhua	Salmonella Pullorum	92	ERY
L68	Luhua	Salmonella Pullorum	92	STR-ERY
L69	Luhua	Salmonella Pullorum	92	ERY
L70	Luhua	Salmonella Pullorum	92	ERY
L71	Luhua	Salmonella Pullorum	92	ERY
L72	Luhua	Salmonella Pullorum	92	ERY
L73	Luhua	Salmonella Pullorum	92	ERY
L74	Luhua	Salmonella Pullorum	92	ERY
L75	Luhua	Salmonella Pullorum	92	ERY
L76	Luhua	Salmonella Pullorum	92	TCY-ERY
L77	Luhua	Salmonella Pullorum	92	ERY
Y1	Langya	Salmonella Pullorum	ST2151	STR-ERY
Y2	Langya	Salmonella Pullorum	ST2151	ERY
Y3	Langya	Salmonella Pullorum	ST2151	ERY
Y4	Langya	Salmonella Pullorum	ST2151	ERY
Y5	Langya	Salmonella Pullorum	ST2151	ERY
Y6	Langya	Salmonella Pullorum	ST2151	STR-ERY-AMP-AMX
Y7	Langya	Salmonella Pullorum	ST2151	ERY
Y8	Langya	Salmonella Pullorum	ST2151	ERY
Y9	Langya	Salmonella Pullorum	ST2151	ERY
Y10	Langya	Salmonella Pullorum	ST2151	STR-ERY-AMP-AMX
Y11	Langya	Salmonella Pullorum	ST2151	STR-ERY-AMX
Y12	Langya	Salmonella Pullorum	ST2151	ERY
Y13	Langya	Salmonella Pullorum	ST2151	STR-ERY-AMX
Y14	Langya	Salmonella Pullorum	ST2151	ERY
Y15	Langya	Salmonella Pullorum	ST2151	STR-ERY-AMP-AMX
Y16	Langya	Salmonella Pullorum	ST92	ERY
Y17	Langya	Salmonella Pullorum	ST2151	ERY
Y18	Langya	Salmonella Pullorum	ST2151	STR-ERY-AMP-AMX
Y19	Langya	Salmonella Pullorum	ST2151	ERY-CAZ
Y20	Langya	Salmonella Pullorum	ST2151	ERY
Q1	Qingjiaoma	Salmonella Pullorum	ST2151	STR-ERY-AMP-AMX
Q2	Qingjiaoma	Salmonella Pullorum	ST92	TE-STR-ERY-DOX
Q3	Qingjiaoma	Salmonella Pullorum	ST92	TE-STR-ERY-CAZ-DOX
Q4	Qingjiaoma	Salmonella Pullorum	ST92	ERY
Q5	Qingjiaoma	Salmonella Pullorum	ST92	ERY
Q6	Qingjiaoma	Salmonella Pullorum	ST92	ERY
Q7	Qingjiaoma	Salmonella Pullorum	ST2151	ERY
Q8	Qingjiaoma	Salmonella Pullorum	ST2151	ERY
Q9	Qingjiaoma	Salmonella Pullorum	ST2151	ERY
Q10	Qingjiaoma	Salmonella Pullorum	ST2151	ERY
Q11	Qingjiaoma	Salmonella Pullorum	ST2151	STR-ERY
Q12	Qingjiaoma	Salmonella Pullorum	ST2151	STR-ERY-AMX
B1	Bairi	Salmonella Pullorum	ST92	AMX-STR-ERY-GM-CAZ-AMP-GAT
B2	Bairi	Salmonella Enteritidis	ST11	TE-ERY-GM-CAZ-AMP
B3	Bairi	Salmonella Pullorum	ST2151	TE-STR-ERY-GM-CAZ-AMP
B4	Bairi	Salmonella Enteritidis	ST11	ERY-CAZ-AMP
B5	Bairi	Salmonella Enteritidis	ST11	TE-ERY
B6	Bairi	Salmonella Enteritidis	ST11	TE-STR-ERY-GM-CAZ-AMP-GAT
B7	Bairi	Salmonella Enteritidis	ST11	TE-STR-ERY-GM-CAZ-AMP
B8	Bairi	Salmonella Enteritidis	ST11	AMX-STR-ERY-AMP
B9	Bairi	Salmonella Enteritidis	ST11	DOX-TE-ERY-CAZ-AMP
B10	Bairi	Salmonella Enteritidis	ST11	TE-ERY-GM-CAZ-AMP-GAT
B11	Bairi	Salmonella Enteritidis	ST11	ERY
B12	Bairi	Salmonella Enteritidis	ST11	ERY-GM-AMP
B13	Bairi	Salmonella Pullorum	ST92	STR-ERY-CAZ-AMP
B14	Bairi	Salmonella Pullorum	ST92	STR-ERY-CAZ-AMP
B15	Bairi	Salmonella Enteritidis	ST11	ERY
B16	Bairi	Salmonella Enteritidis	ST11	TE-ERY-AMP
B17	Bairi	Salmonella Enteritidis	ST11	TE-STR-ERY-CAZ-AMP
B18	Bairi	Salmonella Enteritidis	ST11	TE-ERY-AMP
B19	Bairi	Salmonella Pullorum	ST92	AMX-STR-ERY-CAZ-AMP
B20	Bairi	Salmonella Enteritidis	ST11	AMX-TE-STR-ERY-CAZ-AMP
B21	Bairi	Salmonella Enteritidis	ST11	TE-ERY-GM-CAZ-AMP
B22	Bairi	Salmonella Enteritidis	ST11	TE-STR-ERY-GM-CAZ-AMP-GAT
B23	Bairi	Salmonella Enteritidis	ST11	DOX-AMX-TE-STR-ERY-GM-CAZ-AMP-GAT
B24	Bairi	Salmonella Enteritidis	ST11	TE-STR-ERY-GM-CAZ-AMP
B25	Bairi	Salmonella Pullorum	ST92	STR-ERY-CAZ-AMP
B26	Bairi	Salmonella Pullorum	ST92	OFX-AMX-TE-STR-ERY-CAZ-AMP
B27	Bairi	Salmonella Pullorum	ST92	AMX-STR-ERY-CAZ-AMP
B28	Bairi	Salmonella Pullorum	ST92	OFX-STR-ERY-CAZ-AMP
B29	Bairi	Salmonella Pullorum	ST92	STR-ERY-CAZ
B30	Bairi	Salmonella Pullorum	ST92	FON-DOX-AMX-TE-STR-ERY-CAZ-AMP-GAT
B31	Bairi	Salmonella Pullorum	ST92	OFX-TE-STR-ERY-GM-AMP-GAT
B32	Bairi	Salmonella Pullorum	ST92	OFX-TE-STR-ERY-CAZ-AMP-GAT
B33	Bairi	Salmonella Pullorum	ST92	OFX-ERY-CAZ-ERY
B34	Bairi	Salmonella Pullorum	ST92	DOX-AMX-STR-ERY-CAZ-ERY
B35	Bairi	Salmonella Pullorum	ST2151	FON-OFX-DOX-AMX-TE-STR-ERY-CAZ-AMP
B36	Bairi	Salmonella Pullorum	ST92	AMX-TE-STR-ERY-GM-CAZ-AMP-GAT
B37	Bairi	Salmonella Pullorum	ST2151	FON-OFX-DOX-AMX-TE-STR-ERY-GM-CAZ-AMP-GAT
B38	Bairi	Salmonella Pullorum	ST2151	FON-OFX-DOX-AMX-TE-STR-ERY-CAZ-AMP
B39	Bairi	Salmonella Enteritidis	ST11	STR-ERY-CAZ-AMP
B40	Bairi	Salmonella Pullorum	ST92	OFX-ERY-CAZ-AMP
B41	Bairi	Salmonella Pullorum	ST92	AMX-TE-STR-ERY-CAZ-AMP-GAT
B42	Bairi	Salmonella Pullorum	ST2151	AMX-STR-ERY-CAZ-AMP
B43	Bairi	Salmonella Enteritidis	ST11	FON-DOX-AMX-TE-STR-ERY-CAZ-AMP
B44	Bairi	Salmonella Pullorum	ST92	OFX-TE-STR-ERY-GM-CAZ-AMP-GAT
B45	Bairi	Salmonella Pullorum	ST92	AMX-ERY-CAZ-AMP
B46	Bairi	Salmonella Pullorum	ST92	ERY-CAZ-AMP
